# Supplementary material for: N-Alkyl pyrrolidone ether podands as versatile alkali metal ion chelants
Source: Royal Society of Chemistry journal article supplement (doi:10.1039/c3dt53001a), 2013-12-06

# ***N*-Alkyl Lactam Ether Podands as Versatile Alkali Metal Ion Chelants**

Andrea Perrin,<sup>a</sup> Dominic Myers,<sup>a</sup> Katharina Fücke,<sup>a</sup> Osama M. Musa<sup>b</sup> and Jonathan W. Steed<sup>\*a</sup>

Electronic Supplementary Information

## **IR Spectra**

1-{2-[2-(2-oxo-pyrrolid-1-yl)-ethoxy]-ethyl}-pyrrolid-2-one (neat oil as supplied) (1)

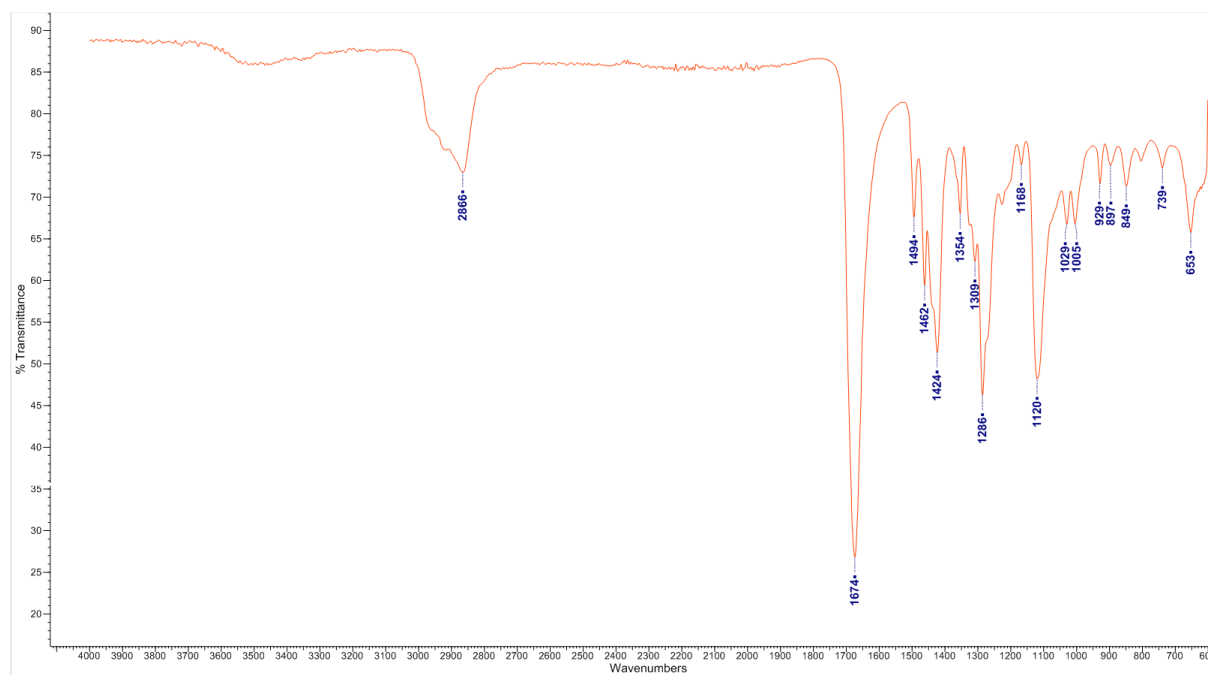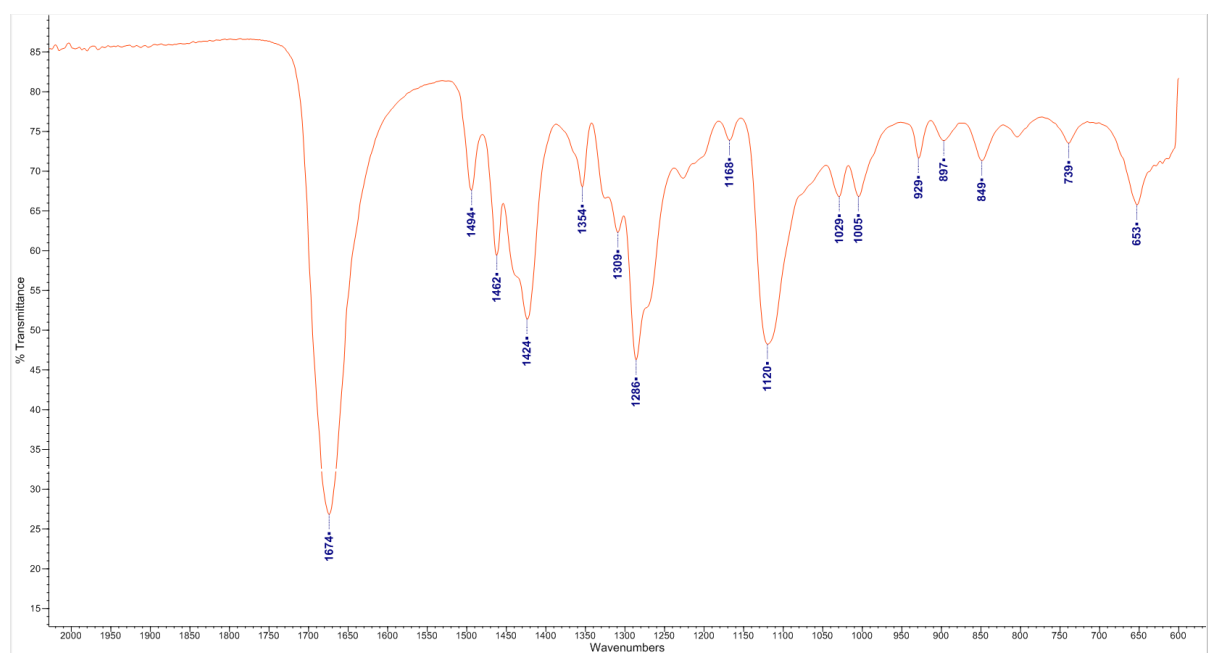

[Na(1)<sub>2</sub>]PF<sub>6</sub>(3)

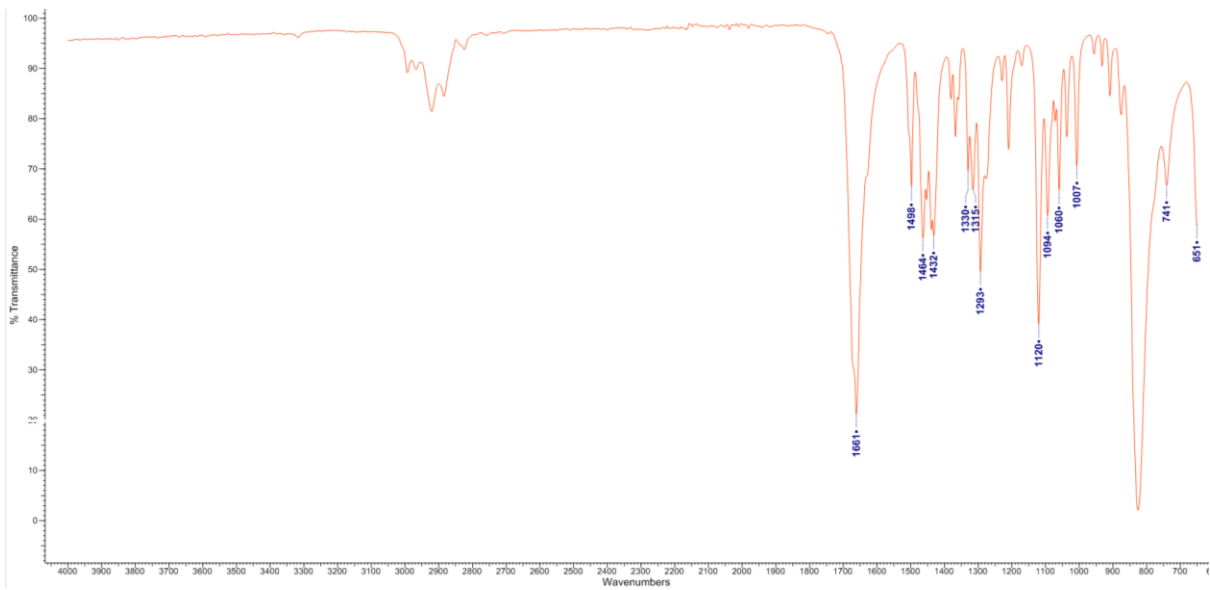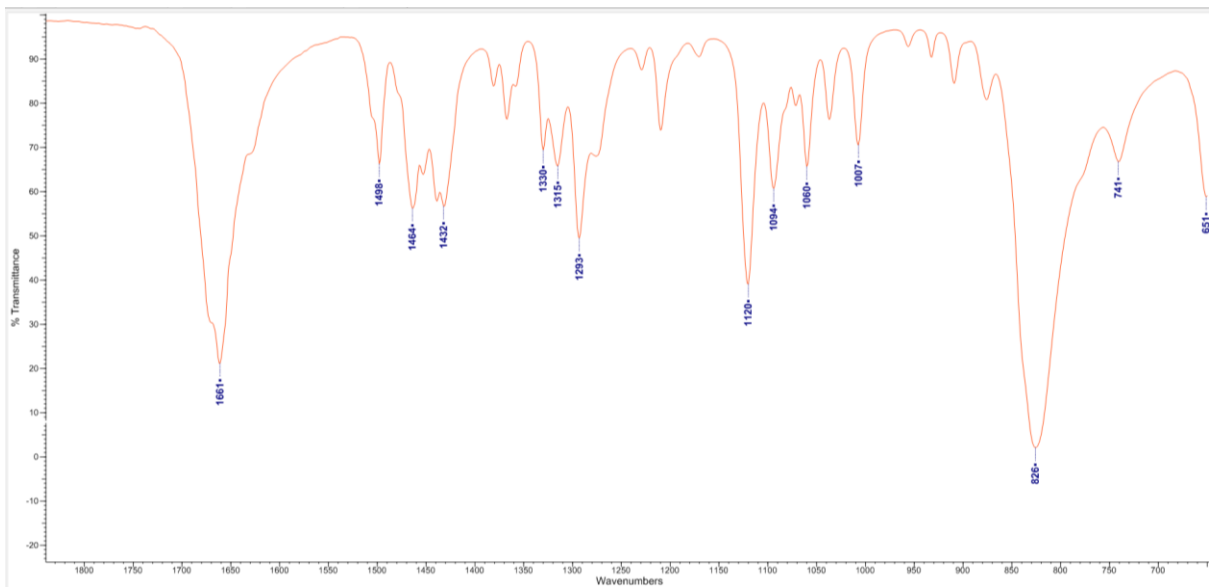

[Na<sub>3</sub>( $\mu$ -**1**)<sub>2</sub>(H<sub>2</sub>O)<sub>2</sub>](PF<sub>6</sub>)<sub>3</sub> (**4**)

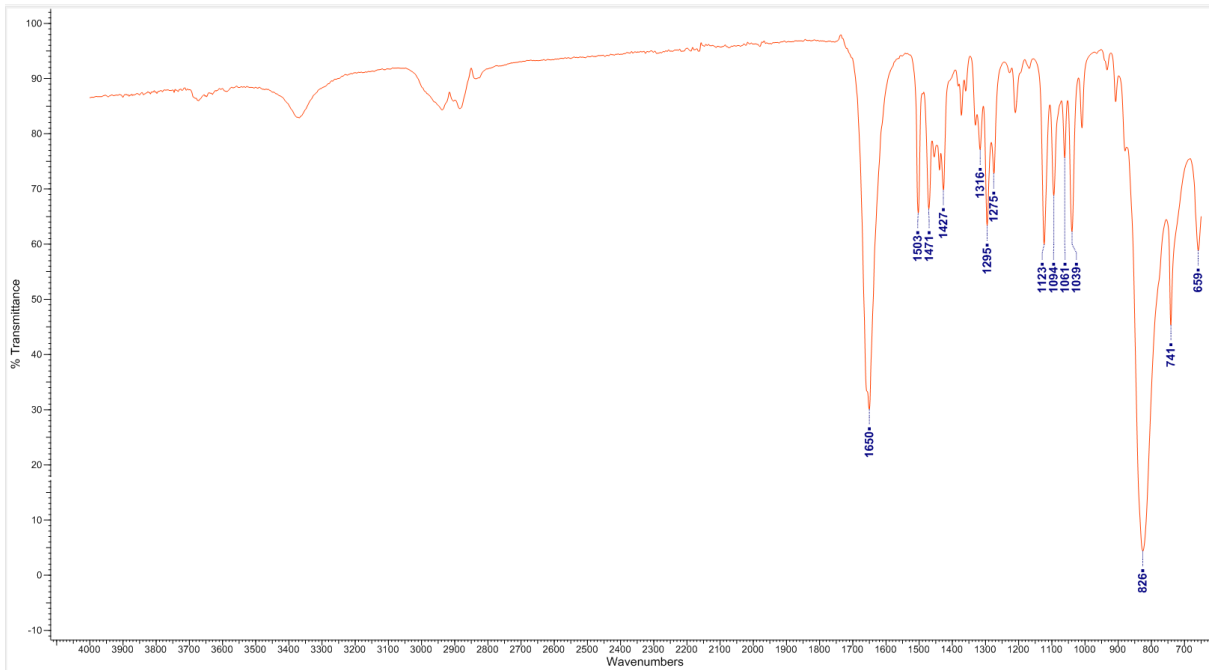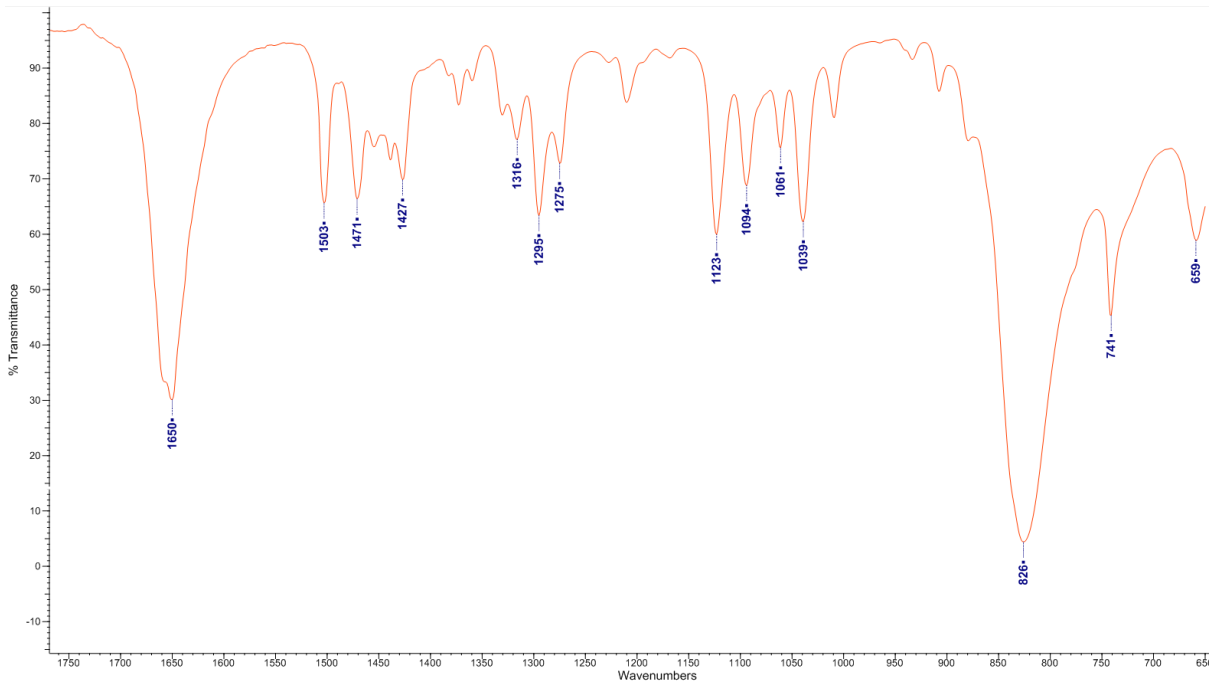

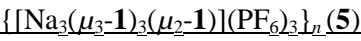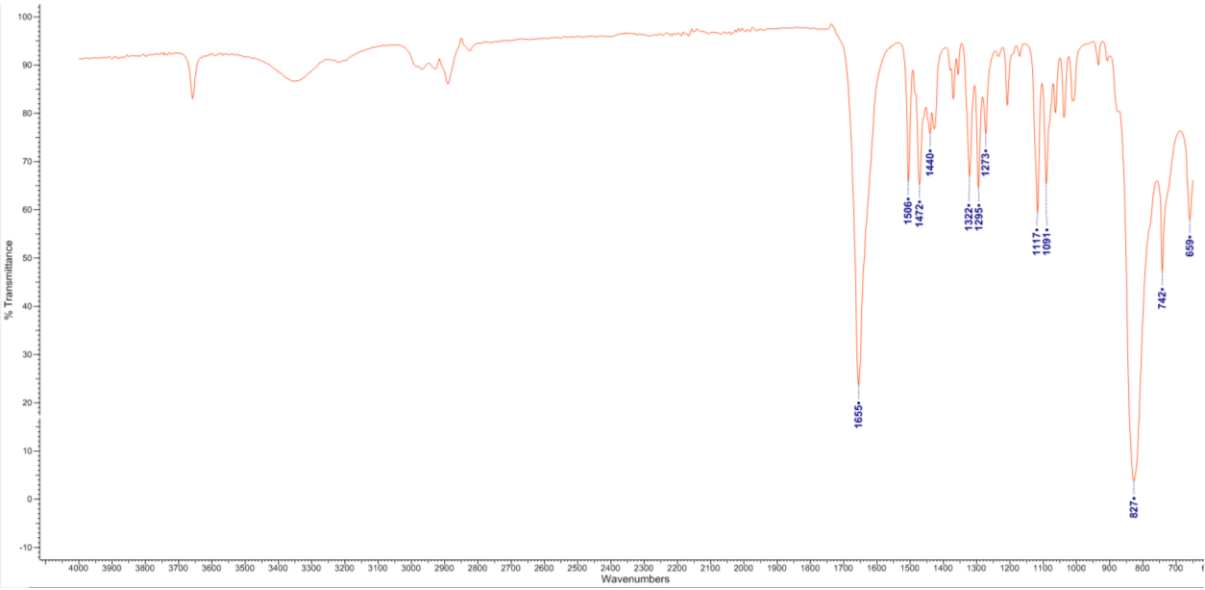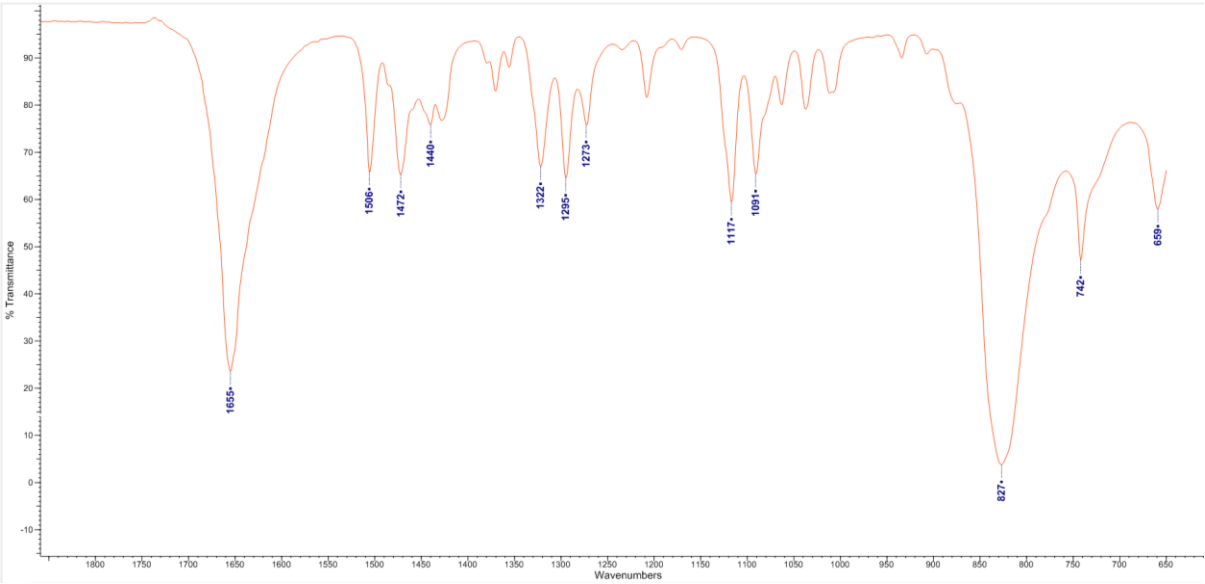

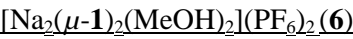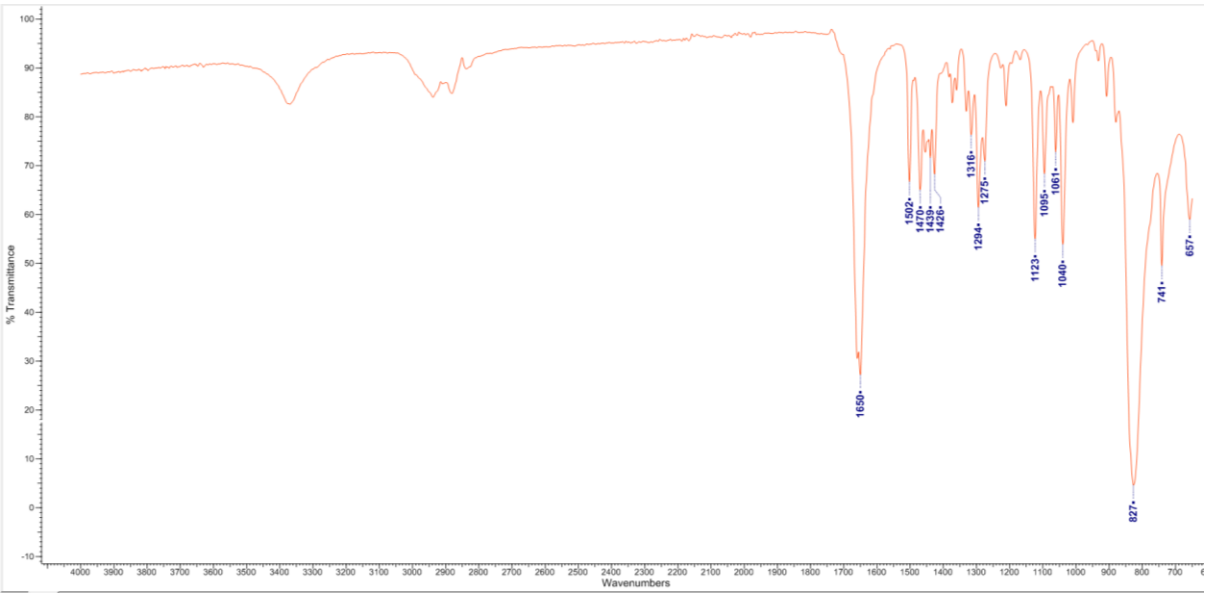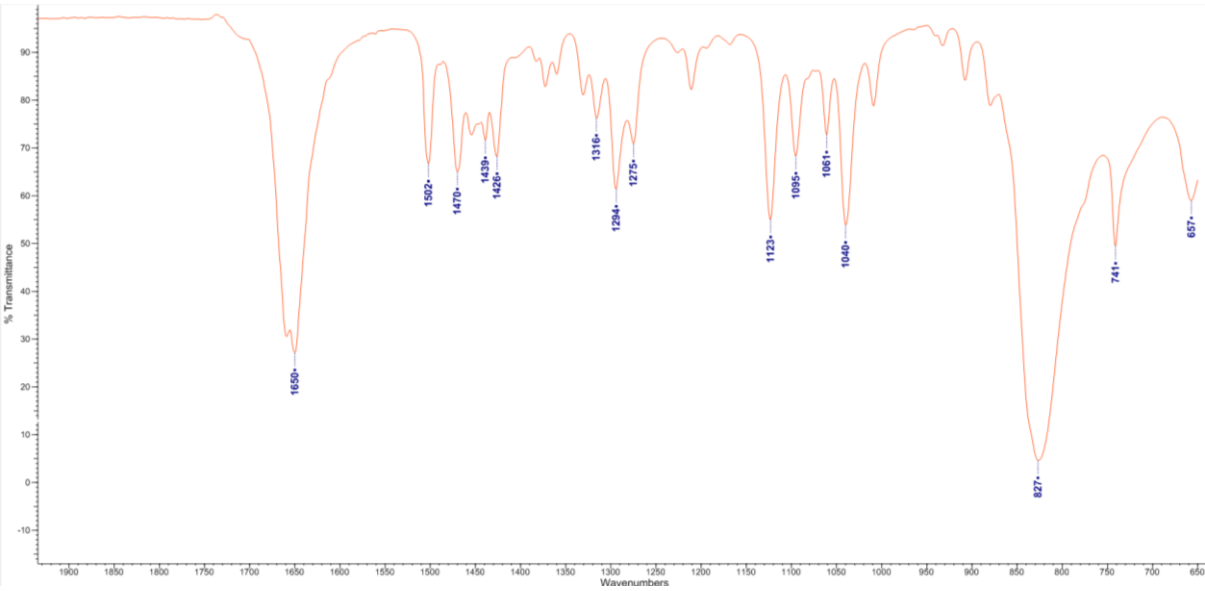

**[Na<sub>2</sub>(1)<sub>2</sub>(H<sub>2</sub>O)<sub>4</sub>](BPh<sub>4</sub>)<sub>2</sub> (7)**

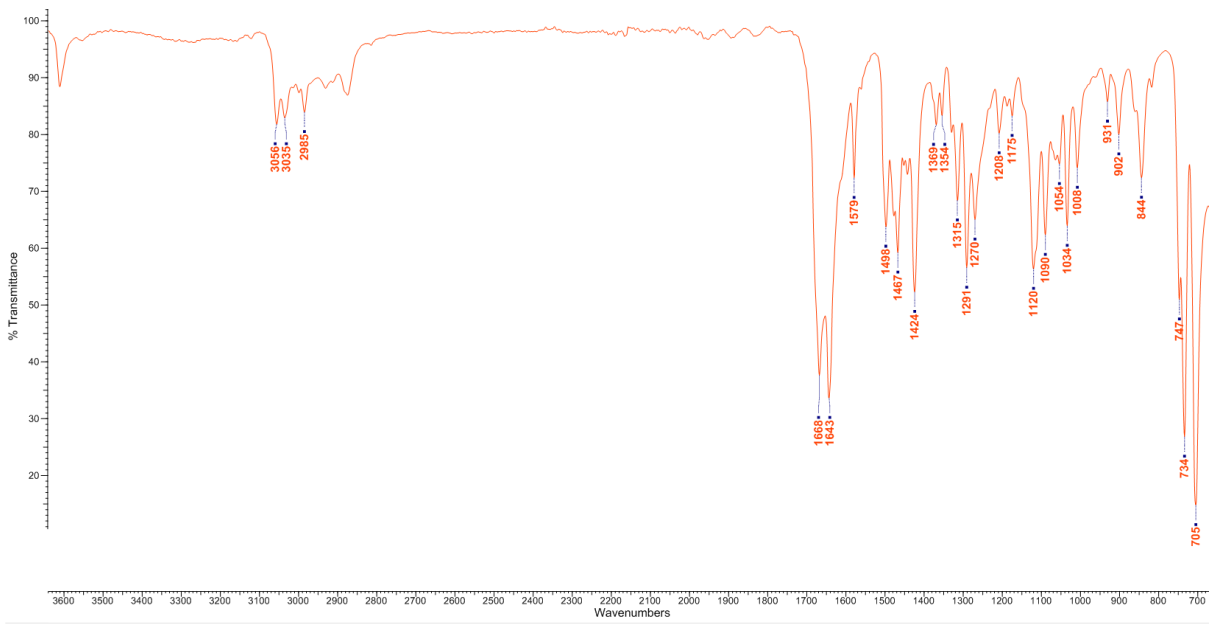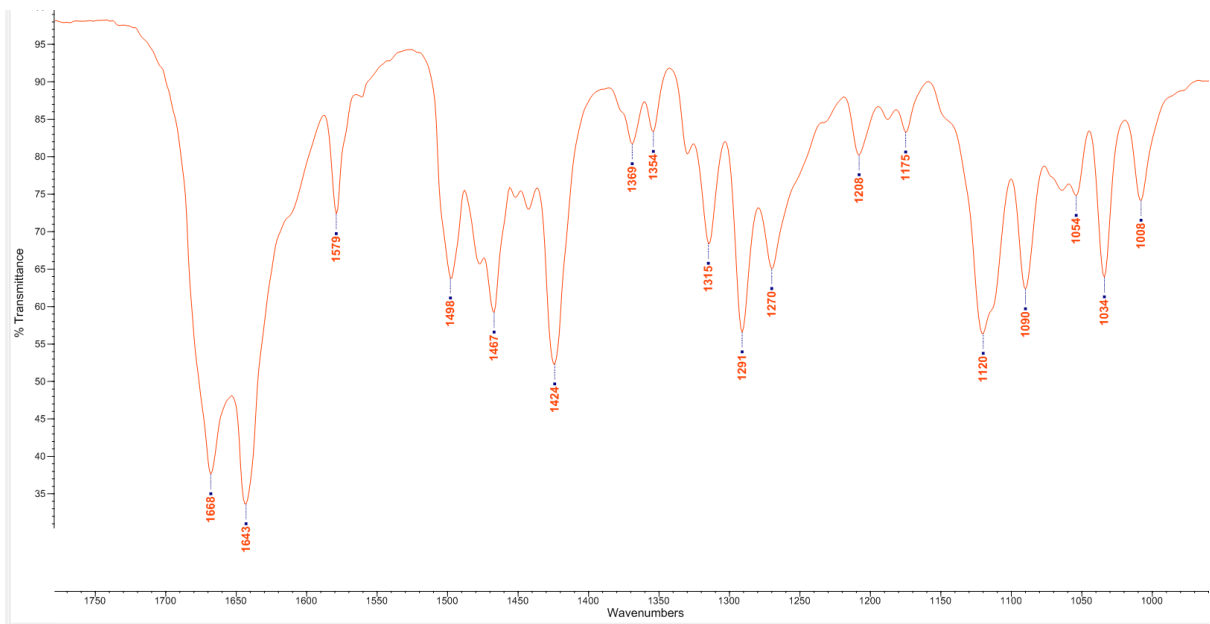

**[Na<sub>2</sub>(**1**)<sub>4</sub>](BPh<sub>4</sub>)<sub>2</sub> (**8**)**

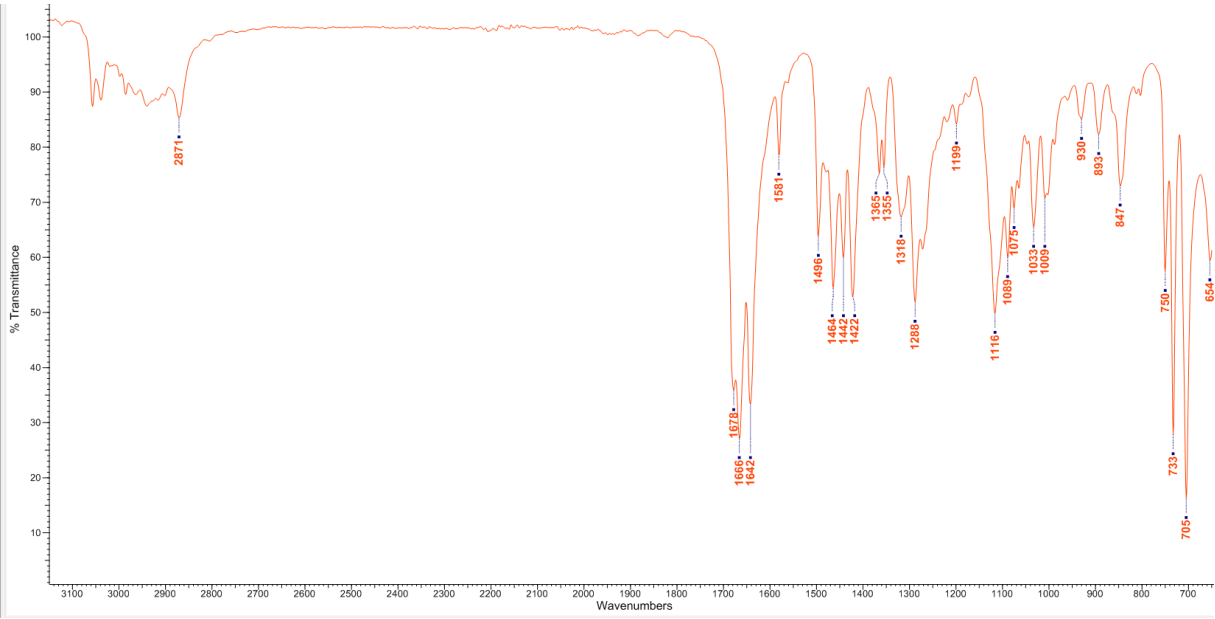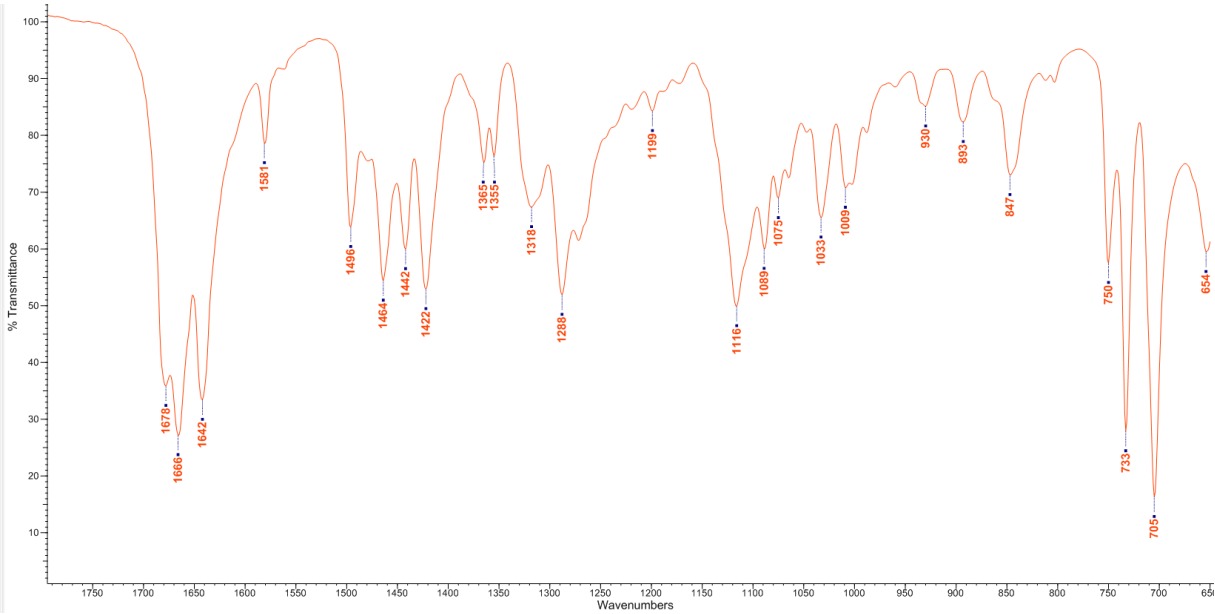

[K(1)<sub>2</sub>]PF<sub>6</sub>(9)

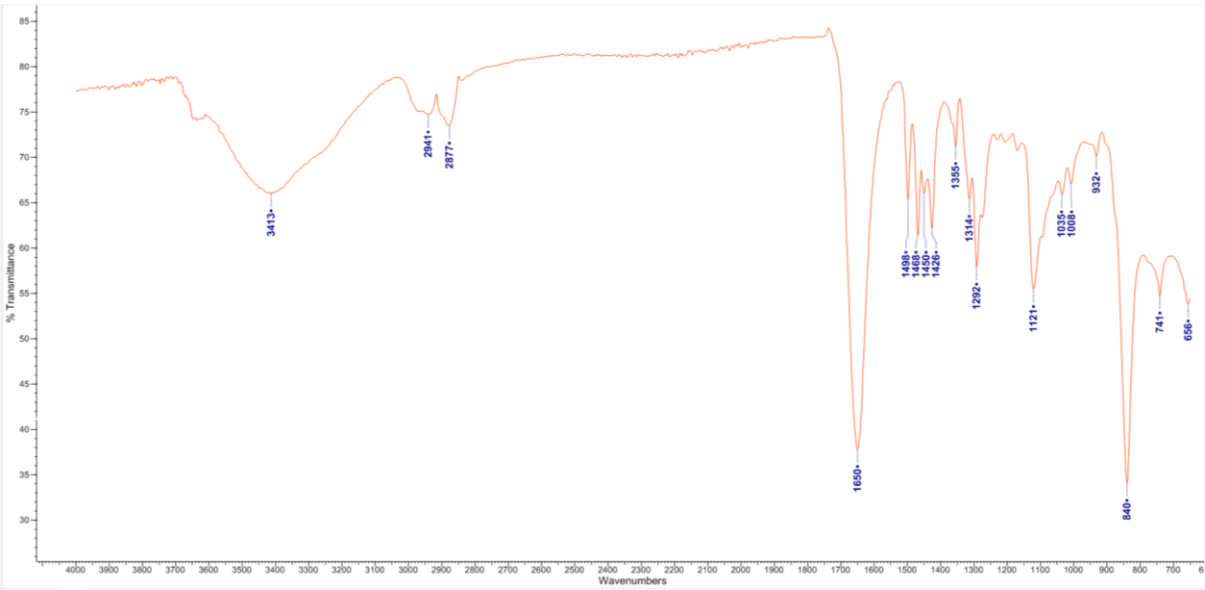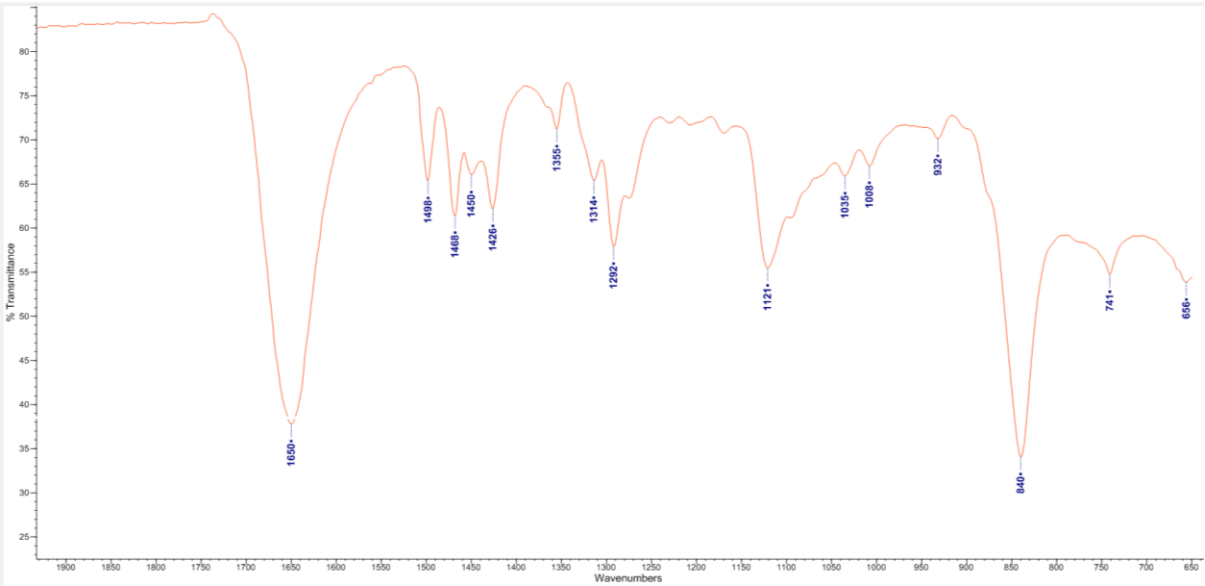



$[K_4(\mu_4-H_2O)_2(\mu-1)_4](PF_6)_4$  (**10a**)

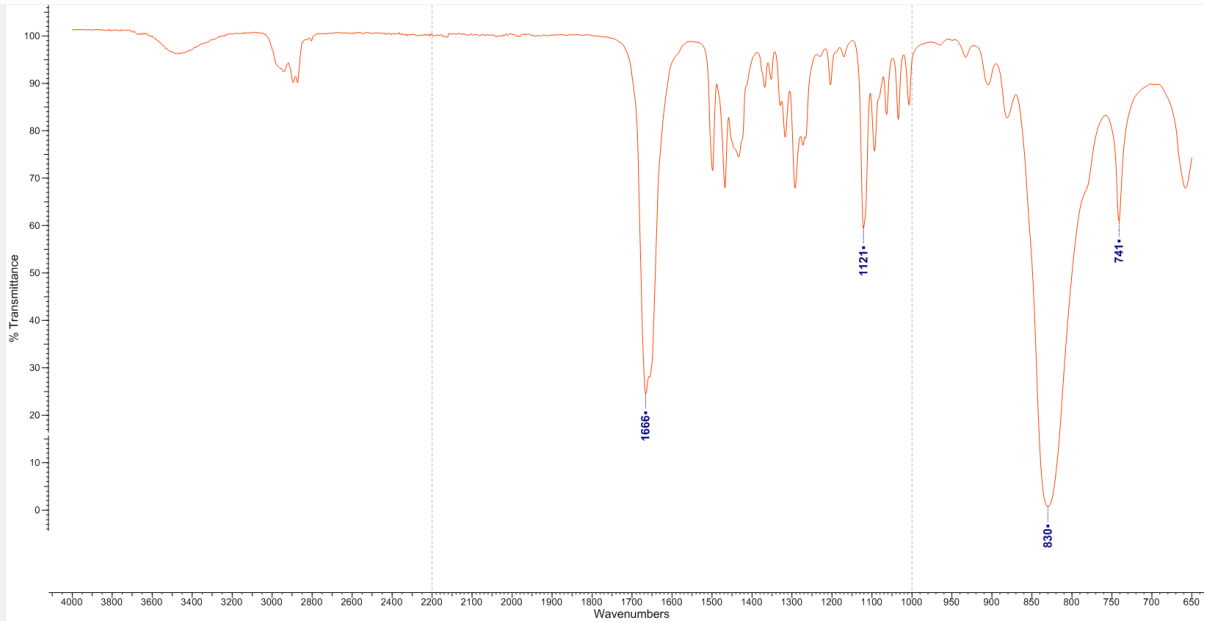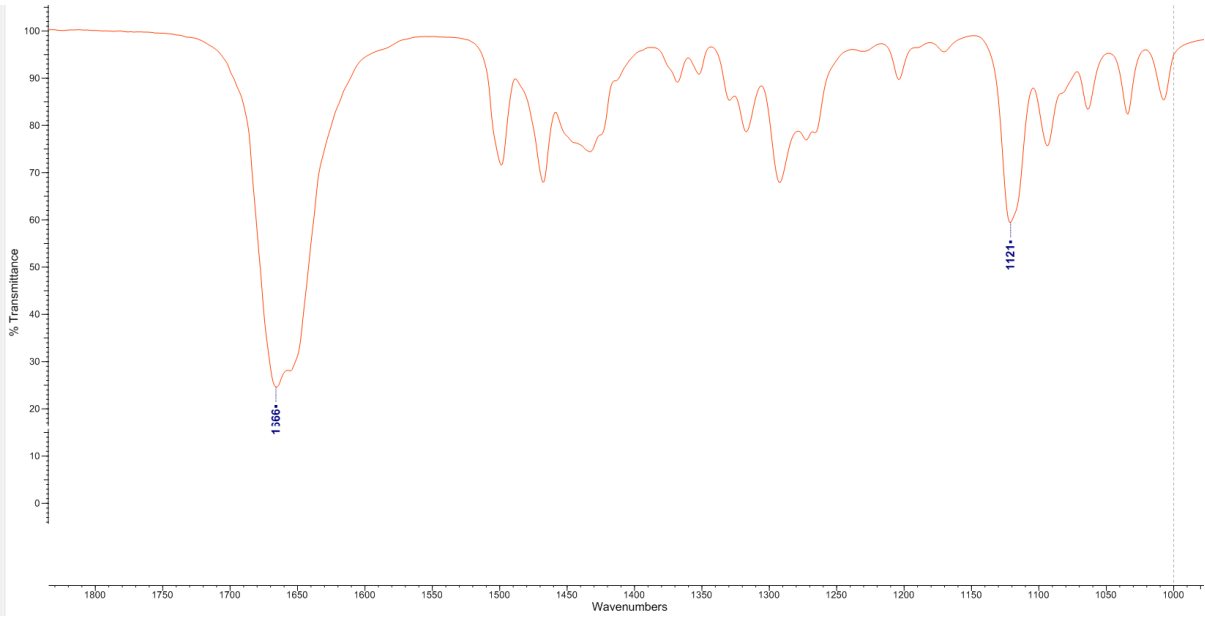

$[K_4(\mu_4-H_2O)_2(\mu-1)_4](PF_6)_4$  (**10b**)

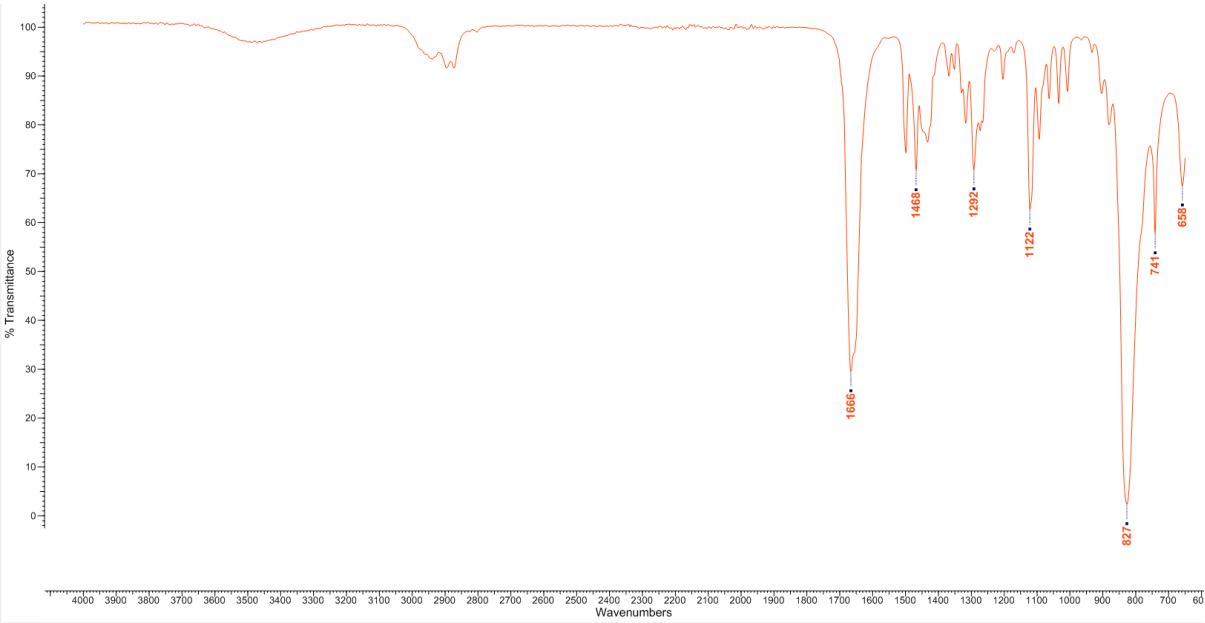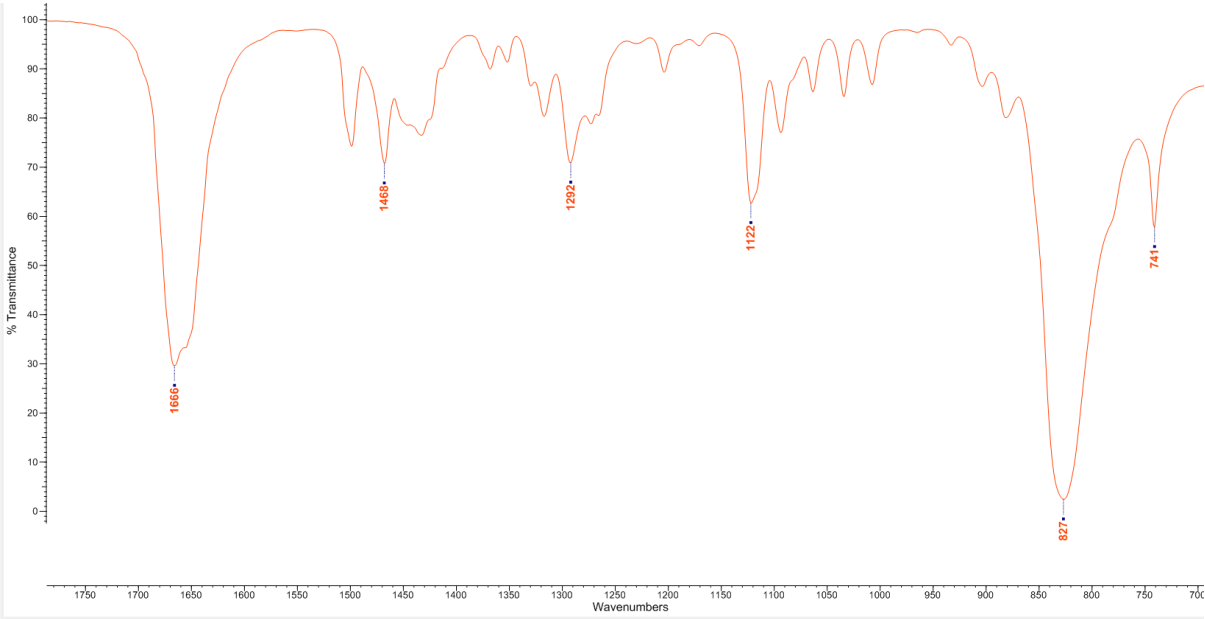

Protonation (**1**·HPF<sub>6</sub>)

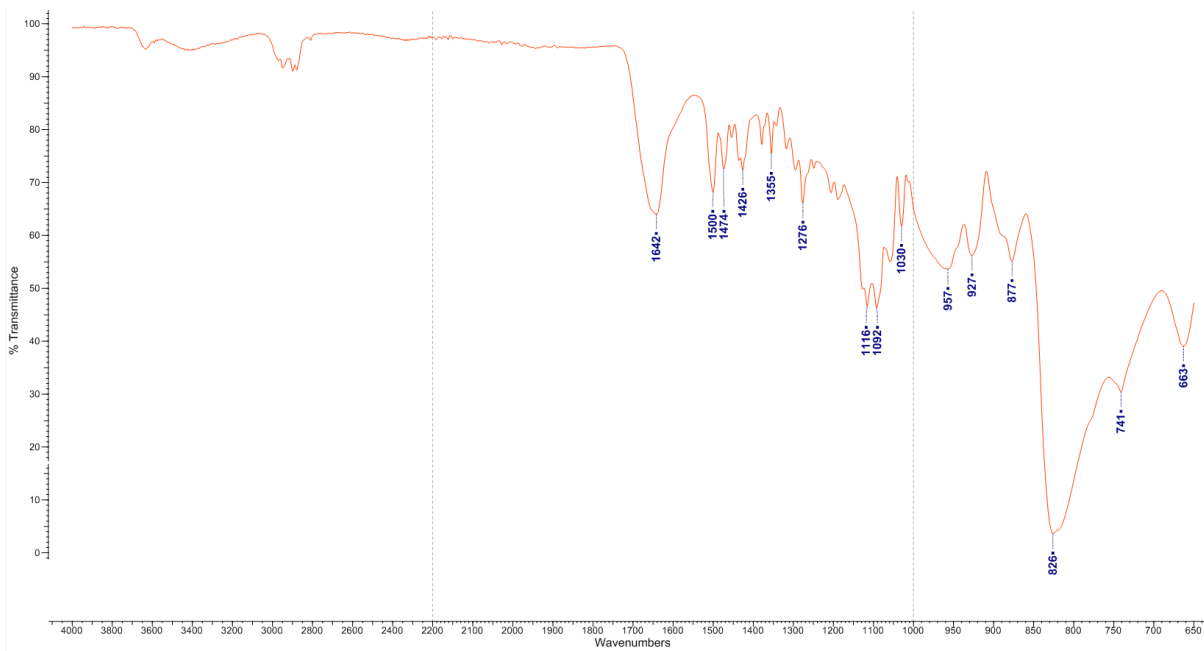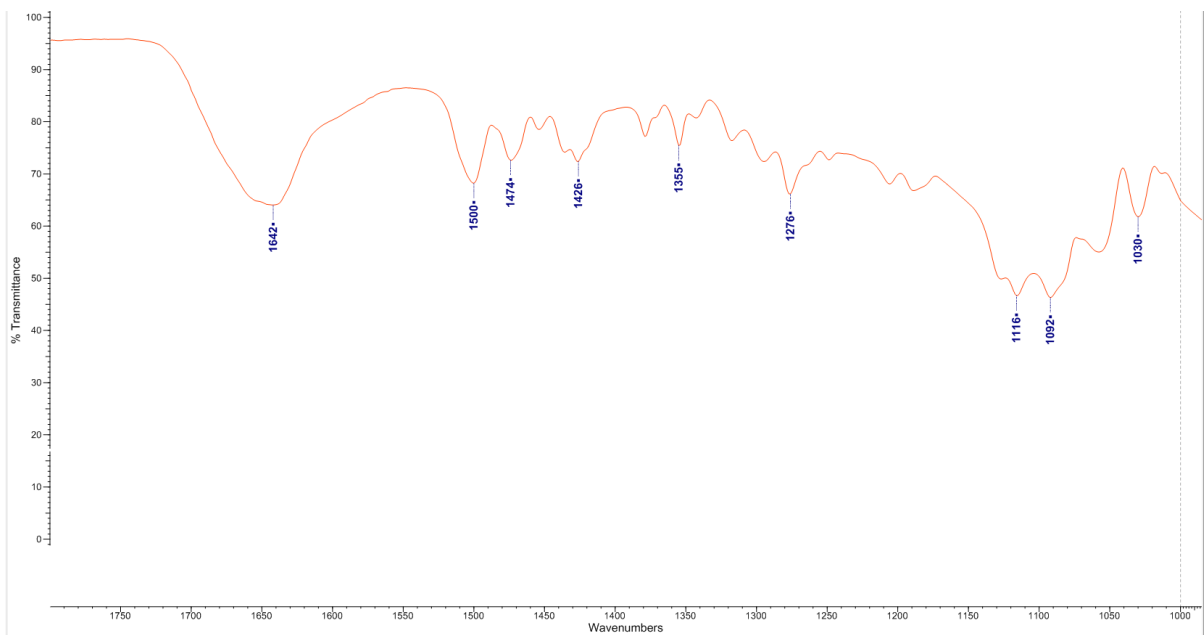

**$\{ZnCl_2(\mu-1)\}_n$  (11)**

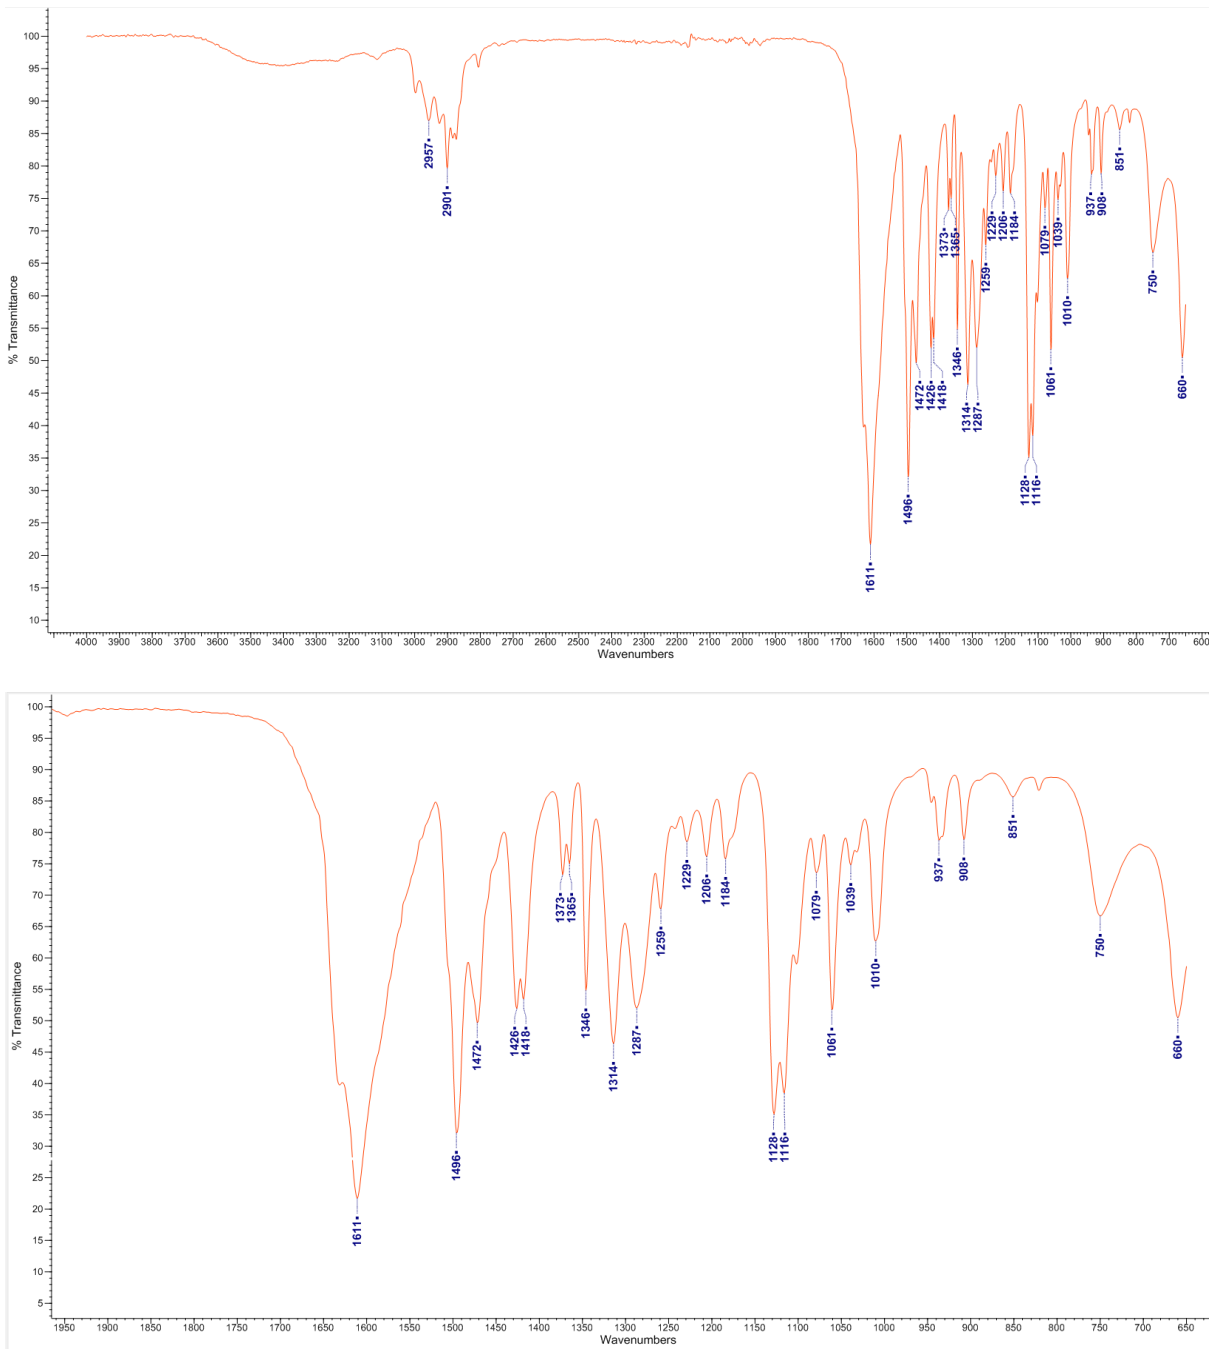

$\{[Na_2(\mu-2)_3](PF_6)_2\}_n$  (12)

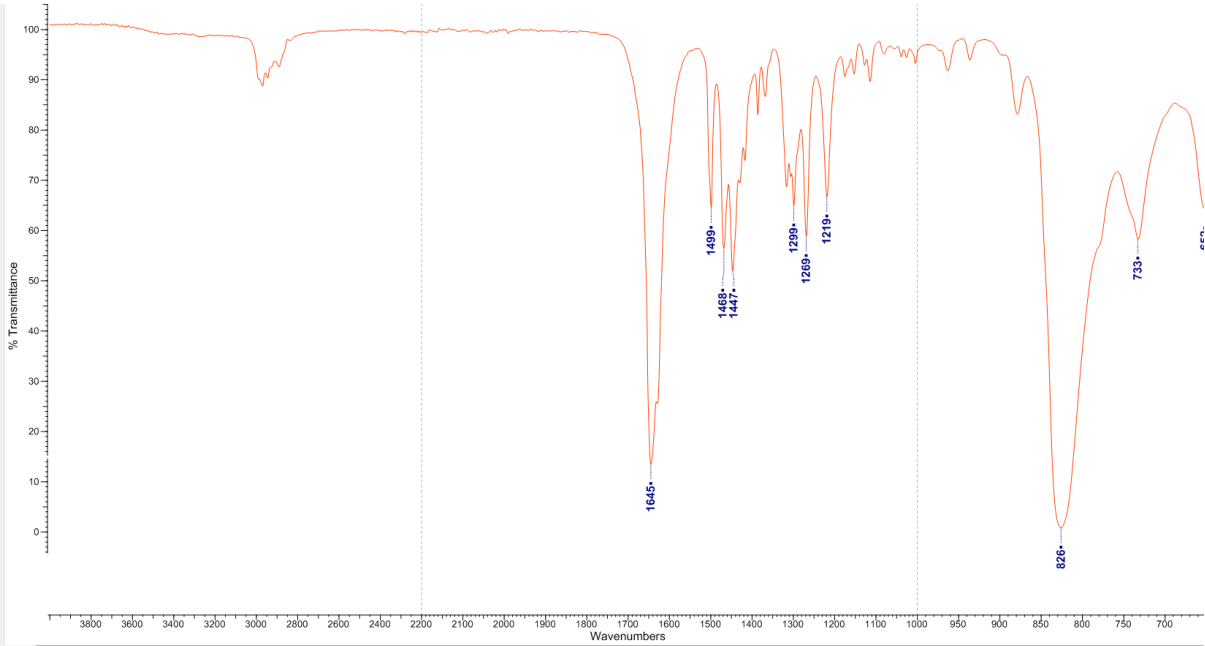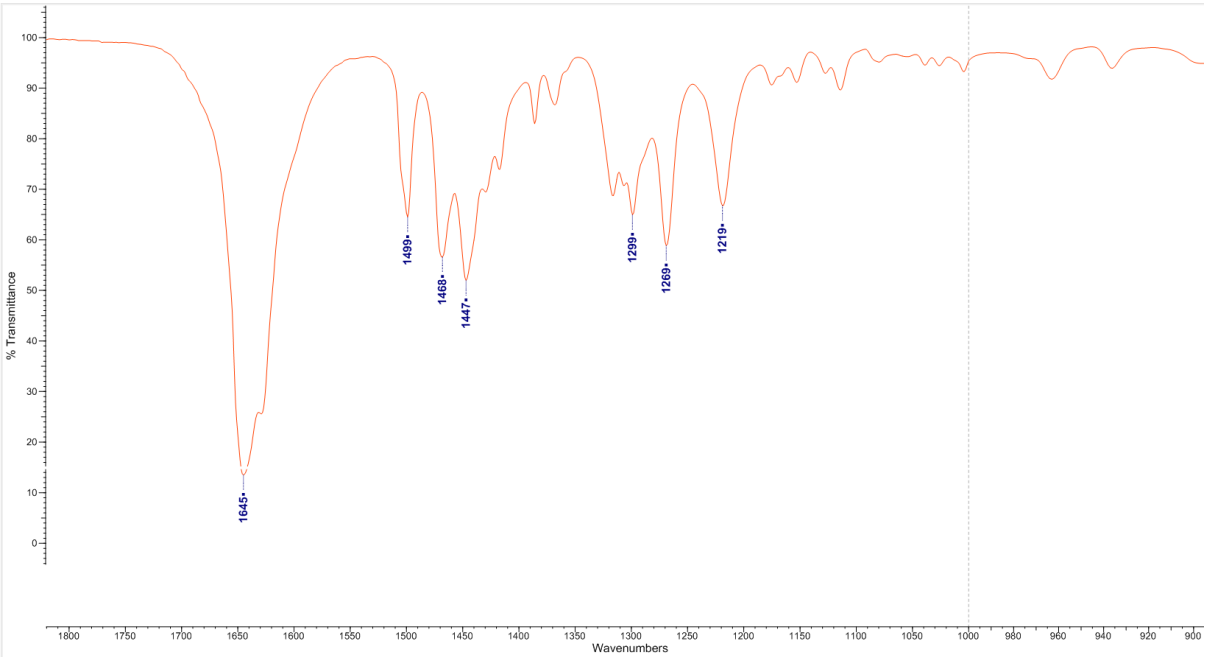

## TGA Analysis

TGA curve for  $[\text{Na}_2(\mu\text{-1})_2(\text{MeOH})_2](\text{PF}_6)_2$  (**6**)

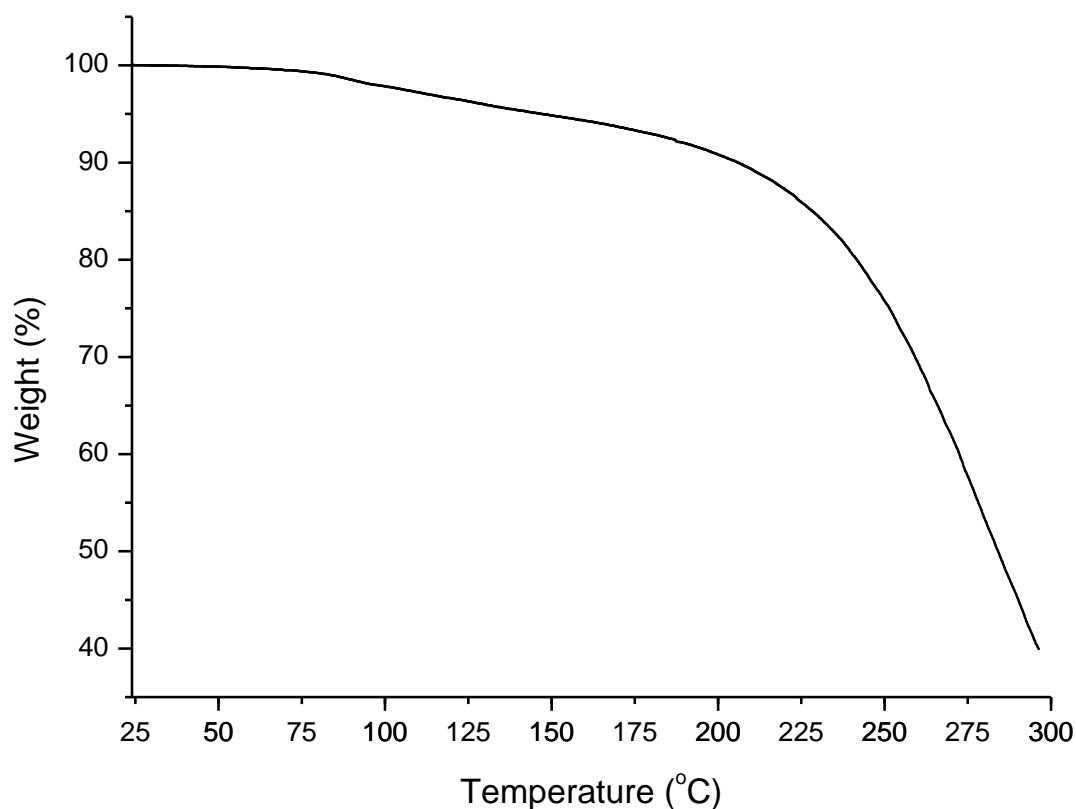

The initial loss up to 182.7 °C corresponds to a weight loss of 7.26% which equates to the loss of two molecules of methanol.

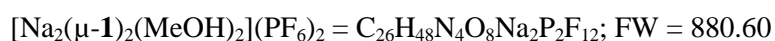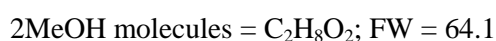

$$\% \text{ MeOH composition} = (64.1/880.60) \times 100 = 7.27\%$$

## Data for Zinc Chloride powder

Addition of 1-{2-[2-(2-oxo-pyrrolid-1-yl)-ethoxy]-ethyl}-pyrrolid-2-one directly to  $\text{ZnCl}_2$  followed by addition of solvent (acetone or acetonitrile) results in the immediate formation of a white crystalline powder upon sonication. Examination of the resultant powder using PXRD (pattern b, below), and comparison to the predicted powder pattern (pattern a) based on the single crystal data for the  $\{[\text{ZnCl}_2(\mu\text{-1})]\}_n$  structure indicates formation of a new material.

### PXRD reaction of **1** with ZnCl<sub>2</sub>

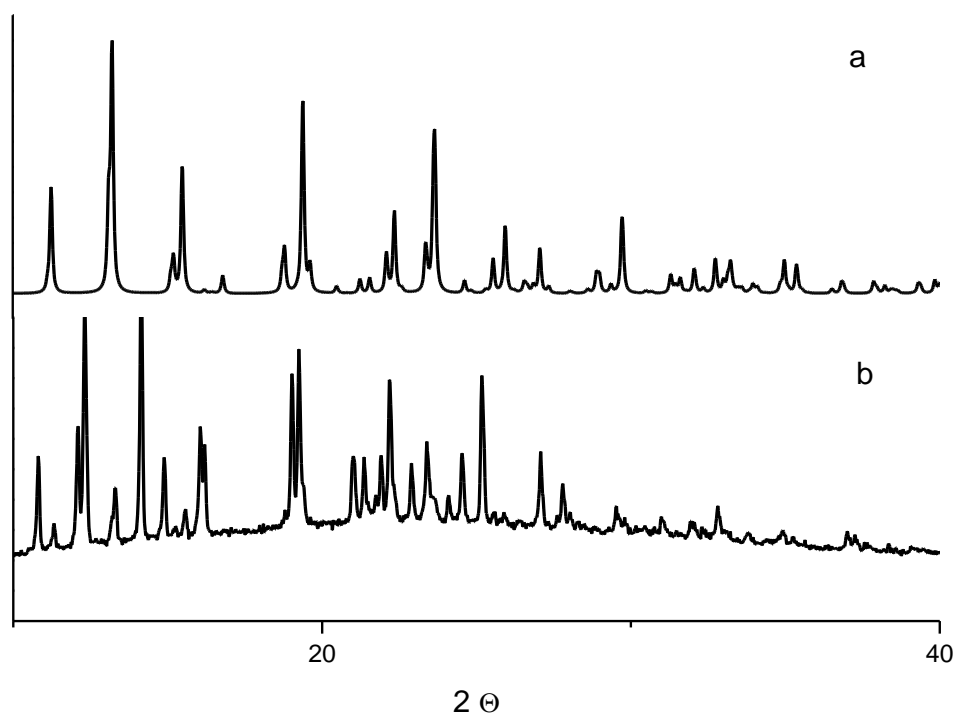

(a) Calculated PXRD pattern based upon **11**  $\{[\text{ZnCl}_2(\mu\text{-1})]\}_n$ ; (b) experimental PXRD pattern of alternative zinc chloride product.

### Elemental Analysis

For the new material found: C 38.19, H 5.45, N 7.29 %

Calculated for **11**: C 38.25, H 5.26, N 7.47 %

### IR spectrum

IR of “new” powder: C=O 1615cm<sup>-1</sup> and C-O ether 1127cm<sup>-1</sup>, *cf.* **11**: C=O 1611cm<sup>-1</sup> and C-O ether 1128cm<sup>-1</sup>

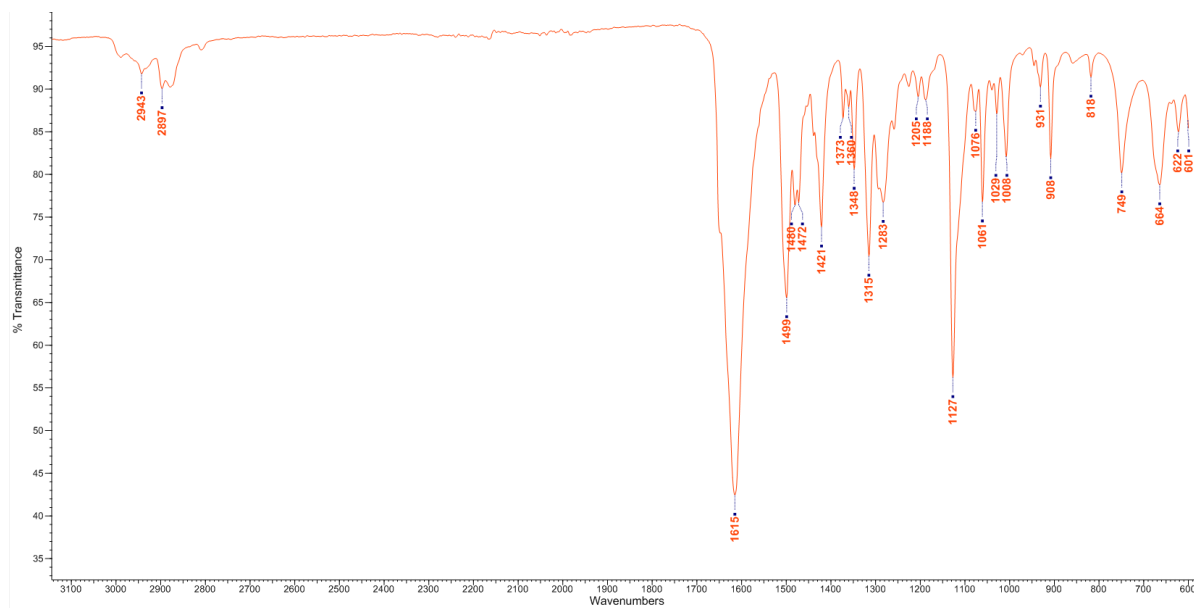

Supplement: c3dt53001a.pdf [file c3dt53001a.pdf]
